# Supplementary material
Source: Royal Society of Chemistry journal article supplement (doi:10.1039/d5lp00380f)
Supplement: d5lp00380f1.pdf [file d5lp00380f1.pdf]

# Supplementary Information: Convergence of high throughput experimentation and machine learning to rapidly advance application-specific polymer development

Mashrafee Aryan, Daniel Struble, Felix Campbell, Saroj Upreti, S. M. Ashik Abedin, Aahil Khambawla, Jeetain Mittal, M. S. Dimitriyev, E. B. Pentzer, S. A. Sukhishvili, Xiaodan Gu, and Boran Ma

## Polymer Sample Record Checklist:

### *Sample Structure*

- Sample ID
- Repeat unit structure
- Molecular weight
- Polymer** Representation (SMILES, SMARTS, SELFIES, etc)

### *Synthesis and PurificationPurPup Conditions*

- Temperature
- Pressure
- Catalyst
- pH level of reaction
- Solvent/Medium
- Concentration
- Reaction Time
- Processing conditions
- Heating medium
- Cooling Method
- Stirring Method
  - Revolutions Per Minute
  - Mixing time
- Batch or Flow
  - Reactor type
- Purification Method

- Type of method used (precipitation, chromatography, etc)
- Filtration Medium (Büchner Funnel, Membrane, etc)

### ***Sample Preparation/Conditions***

- Amount used
- Annealing
  - Time
  - Temperature
  - Apparatus (oven, hot plate, etc)
- Molding conditions
  - Geometry
  - Temperature
  - Pressure
- Casting conditions
  - Solvent(s)
  - Additive(s)
  - Revolutions per minute
  - Film thickness
- Other preparation
  - Powderization (method, details, etc.)
  - Coating (material, method, amount, etc.)

### ***Label Measurements***

- Replicates
- Uncertainties
- Measurement method
- Units
- Labelling Source (Humans, AI, Automated Software)

### ***Instrument Settings***

- Calibration Metadata
- Instrument Used
- Measurement Units
- Model/serial number of instruments

### ***Supplementary***

- Labeler ID
- Raw data files

- Notes/comments
- Software/firmware version

## Example Polymer Sample Record

| Sample Structure                      |                                                                                      |
|---------------------------------------|--------------------------------------------------------------------------------------|
| Sample ID                             | PMMA-HTE-2026-03-001                                                                 |
| Polymer Name                          | Poly(methyl methacrylate)                                                            |
| Repeat Unit Structure                 | -CH <sub>2</sub> -C(CH <sub>3</sub> )(COOCH <sub>3</sub> )-                          |
| Molecular Weight                      | 120,000 g/mol                                                                        |
| Number Average Molecular Weight (Mn): | 60,000 g/mol                                                                         |
| Polydispersity Index (PDI):           | 2                                                                                    |
| Polymer Representation                | Monomer SMILES: CC(=C)C(=O)OC<br>Polymer repeating unit SMILES: [*]CC(C)(C(=O)OC)[*] |

| Processing and Purification Conditions |                                                         |
|----------------------------------------|---------------------------------------------------------|
| Sample ID                              | PMMA-HTE-2026-03-001                                    |
| Heating Medium:                        | Oil bath                                                |
| Cooling Method:                        | Room temperature air cooling                            |
| Stirring Method:                       | Magnetic stir bar                                       |
| Revolutions Per Minute (RPM):          | 500 RPM                                                 |
| Batch or Flow:                         | Batch reactor                                           |
| Mixing Time:                           | 10 minutes prior to polymerization                      |
| Reactor Type:                          | Round-bottom glass flask (250 mL) with reflux condenser |
| Purification Method Used:              | Precipitation                                           |
| Filtration Medium:                     | Büchner funnel with filter paper                        |
| Drying Method:                         | Vacuum oven (40 °C overnight)                           |

| Synthesis Conditions       |                               |
|----------------------------|-------------------------------|
| Sample ID                  | PMMA-HTE-2026-03-001          |
| Polymerization Method:     | Free Radical Polymerization   |
| Temperature:               | 70 °C                         |
| Pressure:                  | 1 atm                         |
| Catalyst / Initiator:      | Azobisisobutyronitrile (AIBN) |
| pH Level of Reaction:      | Neutral (~7)                  |
| Solvent / Reaction Medium: | Toluene                       |
| Monomer Concentration:     | 2.5 M methyl methacrylate     |
| Reaction Time:             | 6 hours                       |

| Label Measurements         |                                                                                                              |
|----------------------------|--------------------------------------------------------------------------------------------------------------|
| <b>Uncertainties:</b>      | Molecular weight uncertainty:<br>±5%<br>Contact angle measurement uncertainty:<br>±2°                        |
| <b>Measurement Method:</b> | Gel Permeation Chromatography (GPC) for molecular weight<br>Contact angle goniometry for surface wettability |
| <b>Units:</b>              | Molecular weight → g/mol<br>Temperature → °C<br>Pressure → atm<br>Contact angle → degrees (°)                |
| <b>Labelling Source:</b>   | Automated software + human verification                                                                      |

| Instrument Settings         |                                                                                                                                  |
|-----------------------------|----------------------------------------------------------------------------------------------------------------------------------|
| <b>Sample ID</b>            | PMMA-HTE-2026-03-001                                                                                                             |
| <b>Instrument Used:</b>     | Agilent 1260 Infinity II GPC                                                                                                     |
| <b>Instrument Settings</b>  | Flow rate: 1.0 mL/min<br>Column temperature: 35 °C<br>Detector: Light Scattering<br>Eluent: THF                                  |
| <b>Calibration Metadata</b> | Calibration standards: Polystyrene standards (500–500,000 g/mol)<br>Calibration date: 2026-03-01<br>Calibration uncertainty: ±3% |

| Supplementary Information |                                                                                                                     |
|---------------------------|---------------------------------------------------------------------------------------------------------------------|
| <b>Sample ID</b>          | PMMA-HTE-2026-03-001                                                                                                |
| <b>Labeler ID:</b>        | LAB-OP-23                                                                                                           |
| <b>Raw Data Files:</b>    | PMMA_HTE_2026_03_001_GPC.csv<br>PMMA_HTE_2026_03_001_contact_angle_images/<br>PMMA_HTE_2026_03_001_reaction_log.txt |
| <b>Storage Location:</b>  | Polymer Data Repository → HTE_Polymers → 2026 → PMMA                                                                |
